# Supplementary material
Source: HighWire-hosted journal article supplement (https://erj.ersjournals.com/content/58/6/2100276)

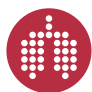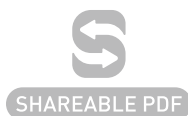

# A contemporary practical approach to the multidisciplinary management of unclassifiable interstitial lung disease

Christopher J. Ryerson<sup>1</sup>, Tamera J. Corte<sup>2</sup>, Jeffrey L. Myers<sup>3</sup>, Simon L.F. Walsh<sup>4</sup> and Sabina A. Guler<sup>5</sup>

<sup>1</sup>Dept of Medicine, University of British Columbia and Centre for Heart Lung Innovation, St Paul's Hospital, Vancouver, BC, Canada.

<sup>2</sup>Dept of Respiratory Medicine, Royal Prince Alfred Hospital, University of Sydney, Centre of Research Excellence for Pulmonary Fibrosis, Sydney, Australia. <sup>3</sup>Dept of Pathology, Michigan Medicine, Ann Arbor, MI, USA. <sup>4</sup>National Heart and Lung Institute, Imperial College, London, UK. <sup>5</sup>Dept of Pulmonary Medicine, Inselspital, Bern University Hospital, University of Bern, Bern, Switzerland.

Corresponding author: Christopher J. Ryerson ([chris.ryerson@hli.ubc.ca](mailto:chris.ryerson@hli.ubc.ca))

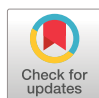

Shareable abstract (@ERSpublications)

**This review describes how patients with unclassifiable ILD should be evaluated and what impact specific clinical, radiological and histopathological features may have on management decisions, focusing on patients with a predominantly fibrotic phenotype** <https://bit.ly/3o43nqr>

**Cite this article as:** Ryerson CJ, Corte TJ, Myers JL, *et al.* A contemporary practical approach to the multidisciplinary management of unclassifiable interstitial lung disease. *Eur Respir J* 2021; 58: 2100276 [DOI: 10.1183/13993003.00276-2021].

This single-page version can be shared freely online.

Copyright ©The authors 2021.

This version is distributed under the terms of the Creative Commons Attribution Non-Commercial Licence 4.0. For commercial reproduction rights and permissions contact [permissions@ersnet.org](mailto:permissions@ersnet.org)

Received: 29 Jan 2021  
Accepted: 4 May 2021

## Abstract

Fibrotic interstitial lung diseases (ILDs) frequently have nonspecific and overlapping clinical and radiological features, resulting in ~10–20% of patients with ILD lacking a clear diagnosis and thus being labelled with unclassifiable ILD. The objective of this review is to describe how patients with unclassifiable ILD should be evaluated, and what impact specific clinical, radiological and histopathological features may have on management decisions, focusing on patients with a predominantly fibrotic phenotype. We highlight recent data that have suggested an increasing role for antifibrotic medications in a variety of fibrotic ILDs, but justify the ongoing importance of making an accurate ILD diagnosis given the benefit of immunomodulatory therapies in many patient populations. We provide a practical approach to support management decisions that can be used by clinicians and tested by clinical researchers, and further identify the need for additional research to support a rational and standardised approach to the management of patients with unclassifiable ILD.

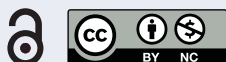

Supplement: inline-supplementary-material-1 [file inline-supplementary-material-1.pdf]
